# Supplementary material
Source: PubMed Central journal article supplement (PMC4458715)
Supplement: supp_M114.044859_mcp.M114.044859-1.pdf [file supp_M114.044859_mcp.M114.044859-1.pdf]

| Full name                                                       | Abbreviation |
|-----------------------------------------------------------------|--------------|
| Carnitine                                                       | C0           |
| Acetyl-carnitine                                                | C2           |
| Propionyl-carnitine                                             | C3           |
| 3-Hydroxypropionyl-carnitine                                    | C3-OH        |
| Malonyl-carnitine                                               | C3-DC        |
| Butyryl-carnitine                                               | C4           |
| 3-Hydroxybutyryl-carnitine                                      | C4-OH        |
| Succinyl-carnitine                                              | C4-DC        |
| VAL or IVAL-carnitine                                           | C5           |
| HVAL or HIVAL-carnitine                                         | C5-OH        |
| Glutaryl-carnitine                                              | C5-DC        |
| Hexanoyl-carnitine                                              | C6           |
| Hydroxyhexanoyl-carnitine                                       | C6-OH        |
| Suberyl-carnitine                                               | C8-DC        |
| Decatrienoyl-carnitine                                          | C10:3        |
| Dodec-2-enoyl-carnitine                                         | C12:1        |
| Docosa-4,7,10,13,16-pentaenoyl-carnitine/Clupanodonyl-carnitine | C22:5        |
| Decenoyl-carnitine                                              | C10:1        |
| Tiglyl-carnitine                                                | C5:1         |
| Octanoyl-carnitine                                              | C8           |
| Octenoyl-carnitine                                              | C8:1         |
| Decanoyl-carnitine                                              | C10          |
| Tetradecanoyl-carnitine/Myristoyl-carnitine                     | C14          |
| Tetradecenoyl-carnitine                                         | C14:1        |
| L-palmitoyl-carnitine                                           | C16          |
| 3-Hydroxyhexadecanoyl-carnitine                                 | C16-OH       |
| Trans-hexadec-2-enoyl-carnitine                                 | C16:1        |
| 3-Hydroxyhexadecenoyl-carnitine                                 | C16:1-OH     |
| Heptadecanoyl-carnitine                                         | C17          |
| Stearoyl-carnitine                                              | C18          |
| Elaidic-carnitine/Vaccenyl-carnitine                            | C18:1        |
| Linoleyl-carnitine/Linoelaidyl-carnitine                        | C18:2        |
| Alpha-linolenyl-carnitine/Gamma-linolenyl-carnitine             | C18:3        |

Supplementary Table 1. **List of acyl-carnitine names.** The number of carbons (C) in the name indicates the number of carbons in acyl group. DC represents dicarboxylic acid in the acyl group. OH means a hydroxyl group attached to the acyl group. The number after “C:” indicates the number of double bonds.
