# Supplementary material
Source: PubMed Central journal article supplement (PMC4458715)
Supplement: supp_M114.044859_mcp.M114.044859-4.pdf [file supp_M114.044859_mcp.M114.044859-4.pdf]

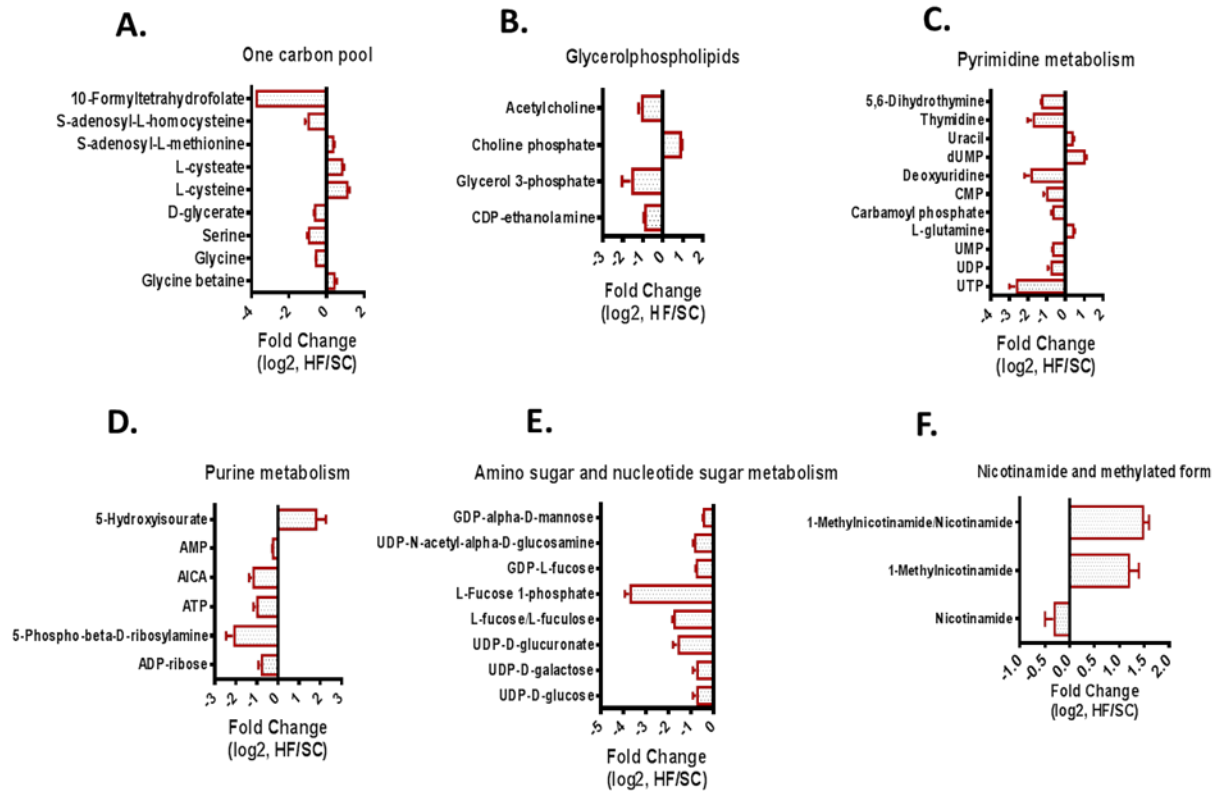

Supplementary Fig. 3. **Metabolites with significant changes in selected pathways.** In A through F, the fold change is calculated by dividing MS intensity of every metabolite in each high fat diet-administered sample by the average obtained from 5 standard chow treated mouse samples.
