# Supplementary material
Source: PubMed Central journal article supplement (PMC4458715)
Supplement: supp_M114.044859_mcp.M114.044859-5.pdf [file supp_M114.044859_mcp.M114.044859-5.pdf]

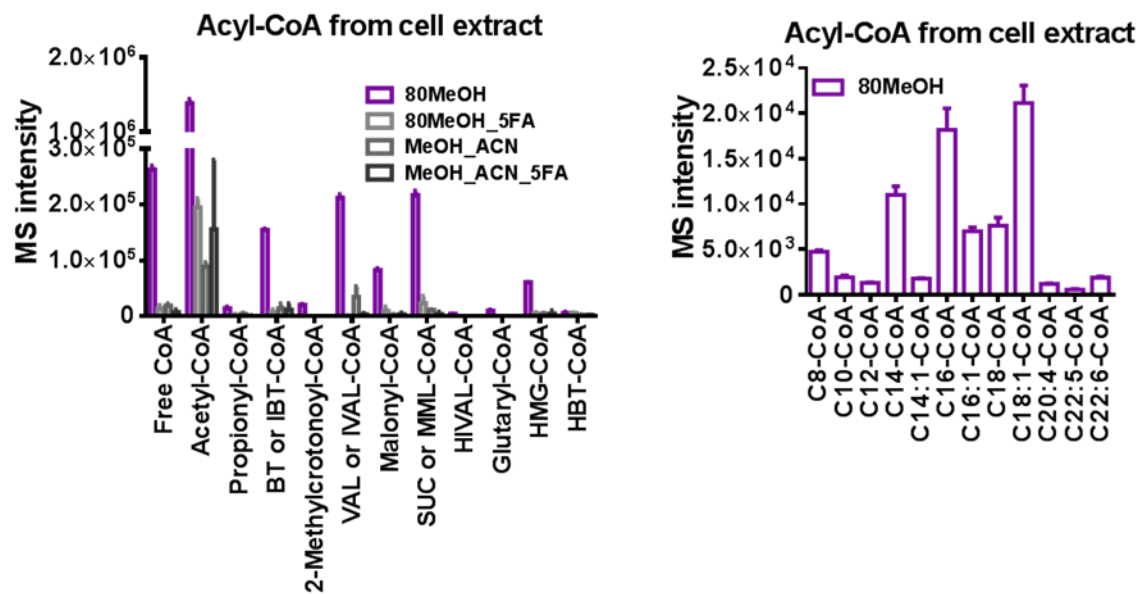

Supplementary Fig. 4. **MS intensities of acyl-CoA detected in HCT116 cells using different extraction solvents.** Samples were prepared in duplicate from HCT116 cells cultured in a 6-well plate (roughly equivalent to extract from  $2 \times 10^5$  cells injected onto the column), and the error bars show standard deviation.
